# Supplementary figures and images for: Expression and Clinical Significance of the Autophagy Proteins BECLIN 1 and LC3 in Ovarian Cancer
Source: Hindawi journal article supplement (doi:10.1155/2014/462658), 2014-01-01

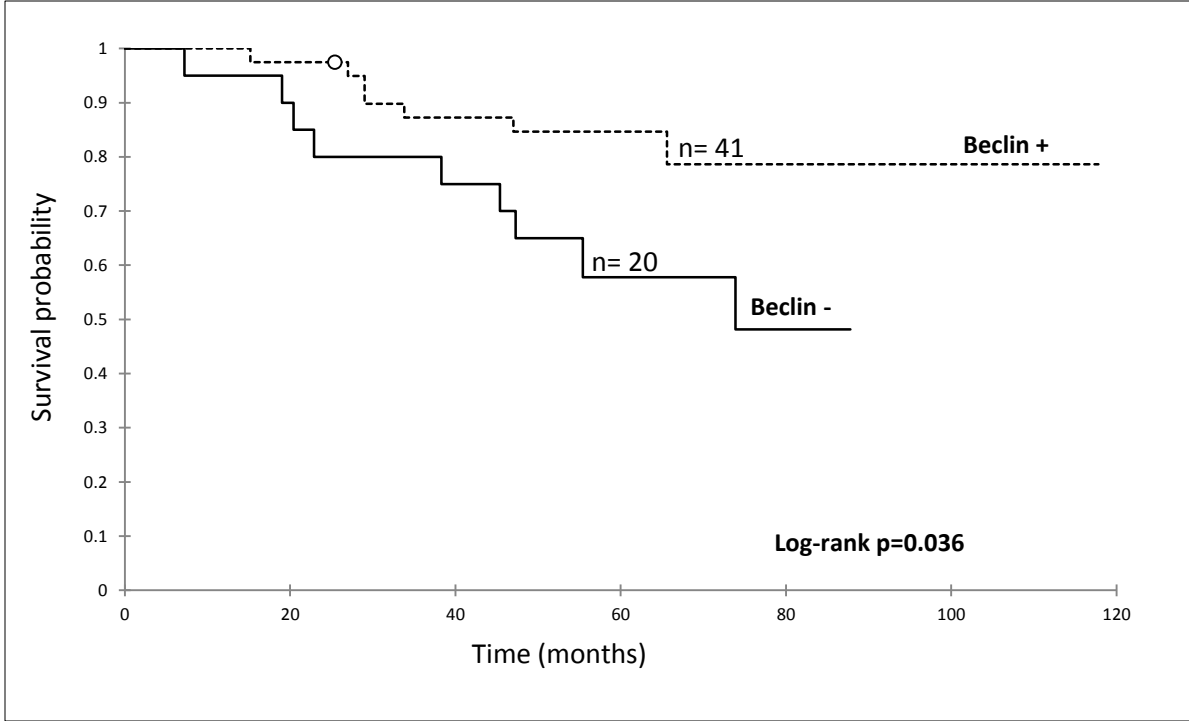

Supplement: f1 [file 462658.f1.zip]
